# Supplementary material
Source: Springer Nature journal article supplement (https://www.springermedizin.de/resource/supplementary/12943_2012_1016_MOESM3_ESM.pdf/9552126)

**A**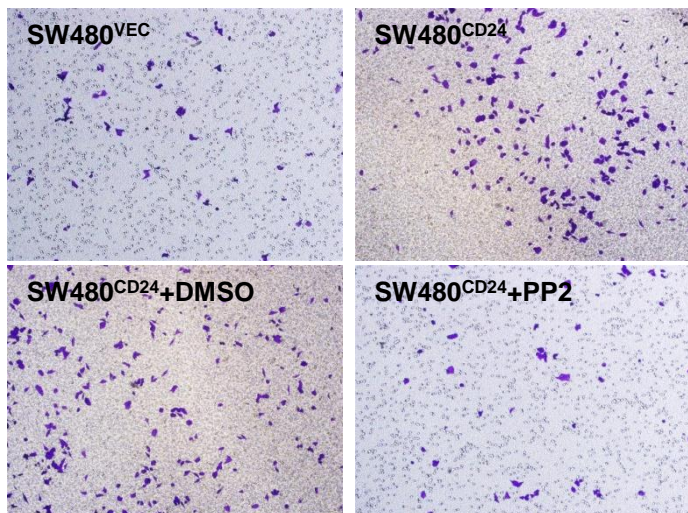**B**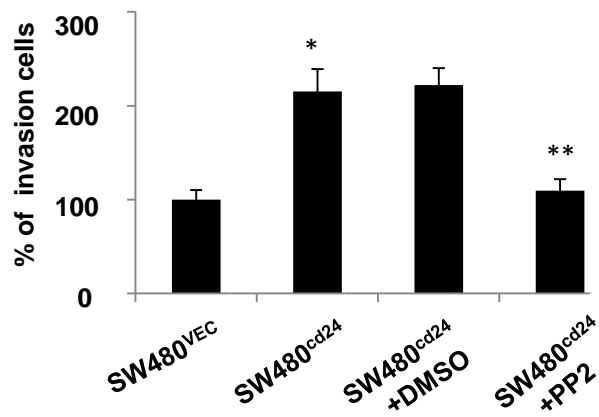**C**

SW480<sup>VEC</sup>      SW480<sup>CD24</sup>      SW480<sup>CD24</sup>+DMSO      SW480<sup>CD24</sup>+PP2

CD24

p-Lyn

Lyn

GAPDH

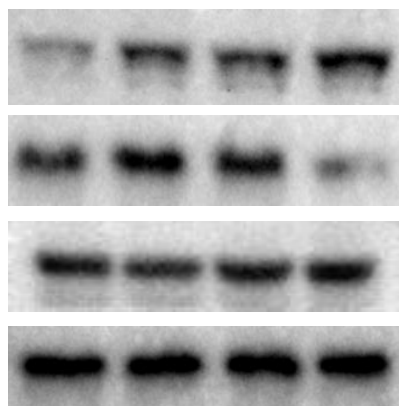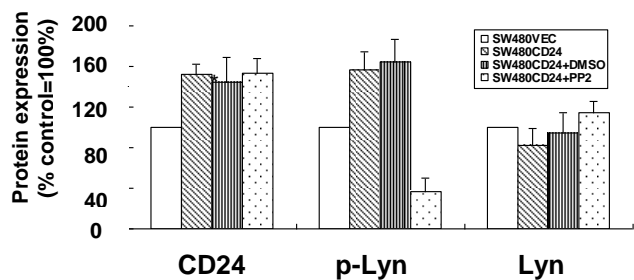**D**p-Lyn  
(green)DAPI  
(blue)

Merge

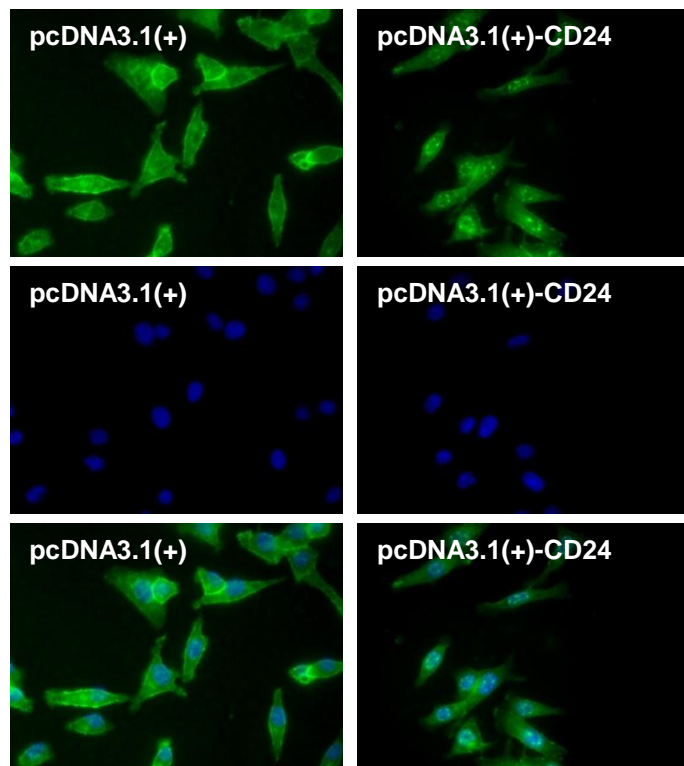

Supplement: MOESM3 [file 9552126]
